# Supplementary material for: Inflammatory and Cytotoxic Activities of Abietane Terpenoids from Nepeta bracteata Benth
Source: MDPI journal article supplement (doi:10.3390/molecules26185603), 2021-09-15
Supplement: s1 [file s1]

## Supporting Information

|            |                                                                                      |    |
|------------|--------------------------------------------------------------------------------------|----|
| Figure S1  | <sup>1</sup> H-NMR (600 MHz, CDCL <sub>3</sub> ) spectrum of <b>1</b> .....          | 2  |
| Figure S2  | <sup>13</sup> C-APT (150 MHz, CDCL <sub>3</sub> ) spectrum of <b>1</b> .....         | 2  |
| Figure S3  | <sup>1</sup> H - <sup>1</sup> H COSY (CDCL <sub>3</sub> ) spectrum of <b>1</b> ..... | 3  |
| Figure S4  | HSQC (CDCL <sub>3</sub> ) spectrum of <b>1</b> .....                                 | 3  |
| Figure S5  | NOESY (CDCL <sub>3</sub> ) spectrum of <b>1</b> .....                                | 4  |
| Figure S6  | HMBC (CDCL <sub>3</sub> ) spectrum of <b>1</b> .....                                 | 4  |
| Figure S7  | <sup>1</sup> H-NMR (600 MHz, CDCL <sub>3</sub> ) spectrum of <b>2</b> .....          | 5  |
| Figure S8  | <sup>13</sup> C-APT (150 MHz, CDCL <sub>3</sub> ) spectrum of <b>2</b> .....         | 5  |
| Figure S9  | <sup>1</sup> H - <sup>1</sup> H COSY (CDCL <sub>3</sub> ) spectrum of <b>2</b> ..... | 6  |
| Figure S10 | HSQC (CDCL <sub>3</sub> ) spectrum of <b>2</b> .....                                 | 6  |
| Figure S11 | NOESY (CDCL <sub>3</sub> ) spectrum of <b>2</b> .....                                | 7  |
| Figure S12 | HMBC (CDCL <sub>3</sub> ) spectrum of <b>2</b> .....                                 | 7  |
| Figure S13 | <sup>1</sup> H-NMR (600 MHz, CDCL <sub>3</sub> ) spectrum of <b>3</b> .....          | 8  |
| Figure S14 | <sup>13</sup> C-APT (150 MHz, CDCL <sub>3</sub> ) spectrum of <b>3</b> .....         | 8  |
| Figure S15 | <sup>1</sup> H - <sup>1</sup> H COSY (CDCL <sub>3</sub> ) spectrum of <b>3</b> ..... | 9  |
| Figure S16 | HSQC (CDCL <sub>3</sub> ) spectrum of <b>3</b> .....                                 | 9  |
| Figure S17 | NOESY (CDCL <sub>3</sub> ) spectrum of <b>3</b> .....                                | 10 |
| Figure S18 | HMBC (CDCL <sub>3</sub> ) spectrum of <b>3</b> .....                                 | 10 |
| Figure S19 | <sup>1</sup> H-NMR (600 MHz, CDCL <sub>3</sub> ) spectrum of <b>4</b> .....          | 11 |
| Figure S20 | <sup>13</sup> C-APT (150 MHz, CDCL <sub>3</sub> ) spectrum of <b>4</b> .....         | 11 |
| Figure S21 | <sup>1</sup> H - <sup>1</sup> H COSY (CDCL <sub>3</sub> ) spectrum of <b>4</b> ..... | 12 |
| Figure S22 | HSQC (CDCL <sub>3</sub> ) spectrum of <b>4</b> .....                                 | 12 |
| Figure S23 | NOESY (CDCL <sub>3</sub> ) spectrum of <b>4</b> .....                                | 13 |
| Figure S24 | HMBC (CDCL <sub>3</sub> ) spectrum of <b>4</b> .....                                 | 13 |
| Figure S25 | <sup>1</sup> H-NMR (600 MHz, CDCL <sub>3</sub> ) spectrum of <b>5</b> .....          | 14 |
| Figure S26 | <sup>13</sup> C-APT (150 MHz, CDCL <sub>3</sub> ) spectrum of <b>5</b> .....         | 14 |
| Figure S27 | <sup>1</sup> H - <sup>1</sup> H COSY (CDCL <sub>3</sub> ) spectrum of <b>5</b> ..... | 15 |
| Figure S28 | HSQC (CDCL <sub>3</sub> ) spectrum of <b>5</b> .....                                 | 15 |
| Figure S29 | NOESY (CDCL <sub>3</sub> ) spectrum of <b>5</b> .....                                | 16 |
| Figure S30 | HMBC (CDCL <sub>3</sub> ) spectrum of <b>5</b> .....                                 | 16 |
| Figure S31 | Experimental and calculated ECD spectra of <b>2</b> .....                            | 17 |
| Figure S32 | Experimental and calculated ECD spectra of <b>3</b> .....                            | 17 |
| Figure S33 | Experimental and calculated ECD spectra of <b>4</b> .....                            | 18 |
| Figure S34 | Experimental and calculated ECD spectra of <b>5</b> .....                            | 18 |

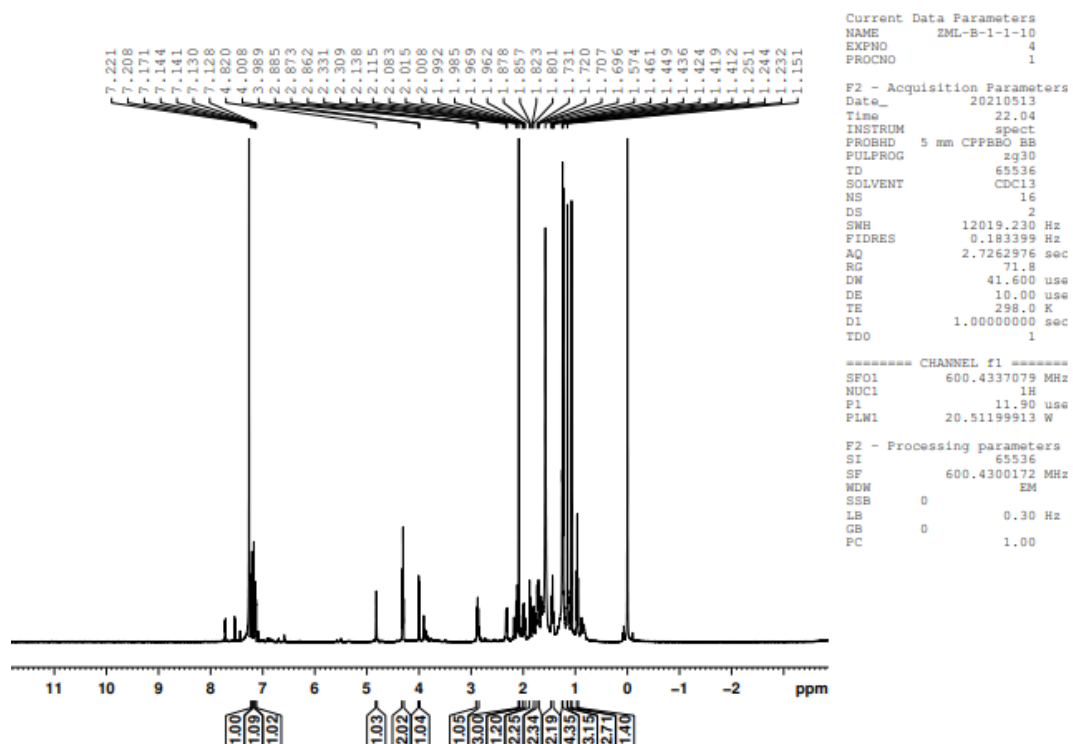

Figure S1  $^1\text{H}$ -NMR (600 MHz,  $\text{CDCl}_3$ ) spectrum of 1

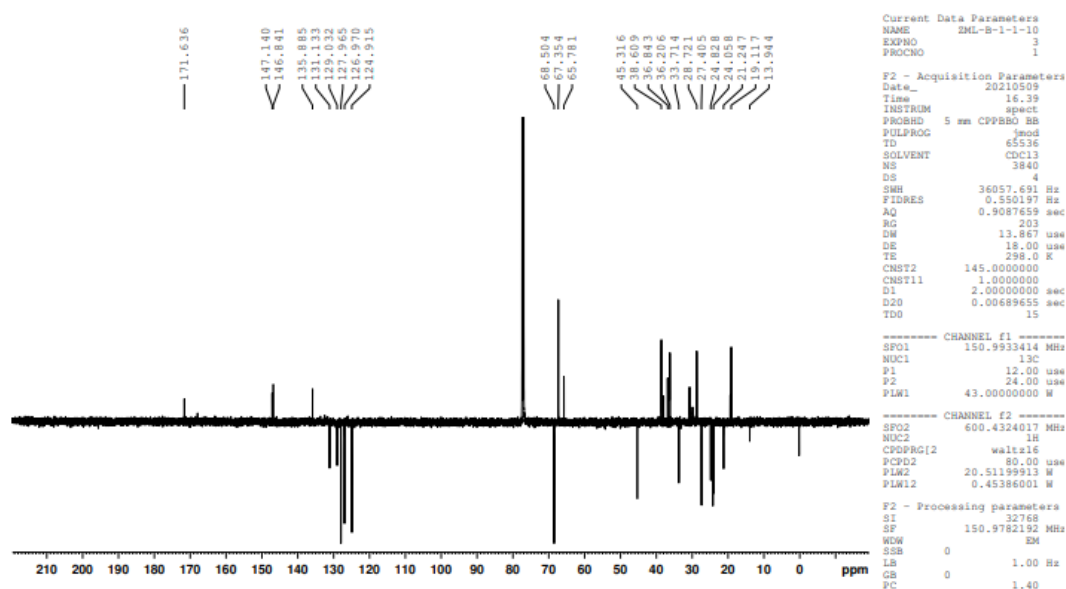

Figure S2  $^{13}\text{C}$ -APT (150 MHz,  $\text{CDCl}_3$ ) spectrum of 1

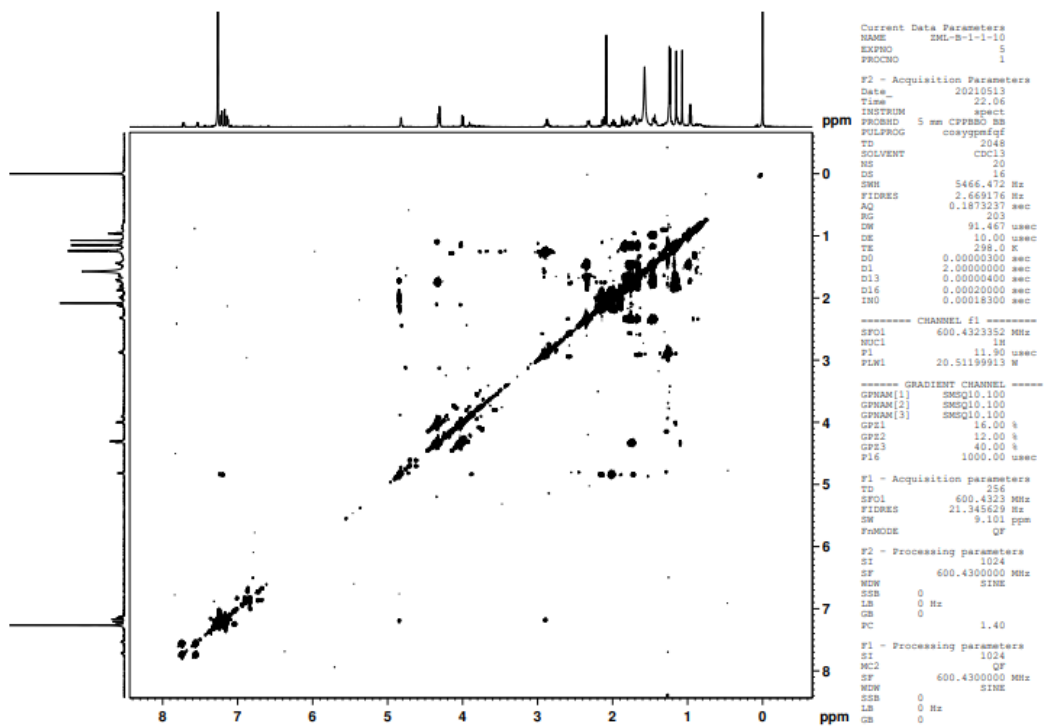

Figure S3  $^1\text{H}$ - $^1\text{H}$  COSY ( $\text{CDCl}_3$ ) spectrum of **1**

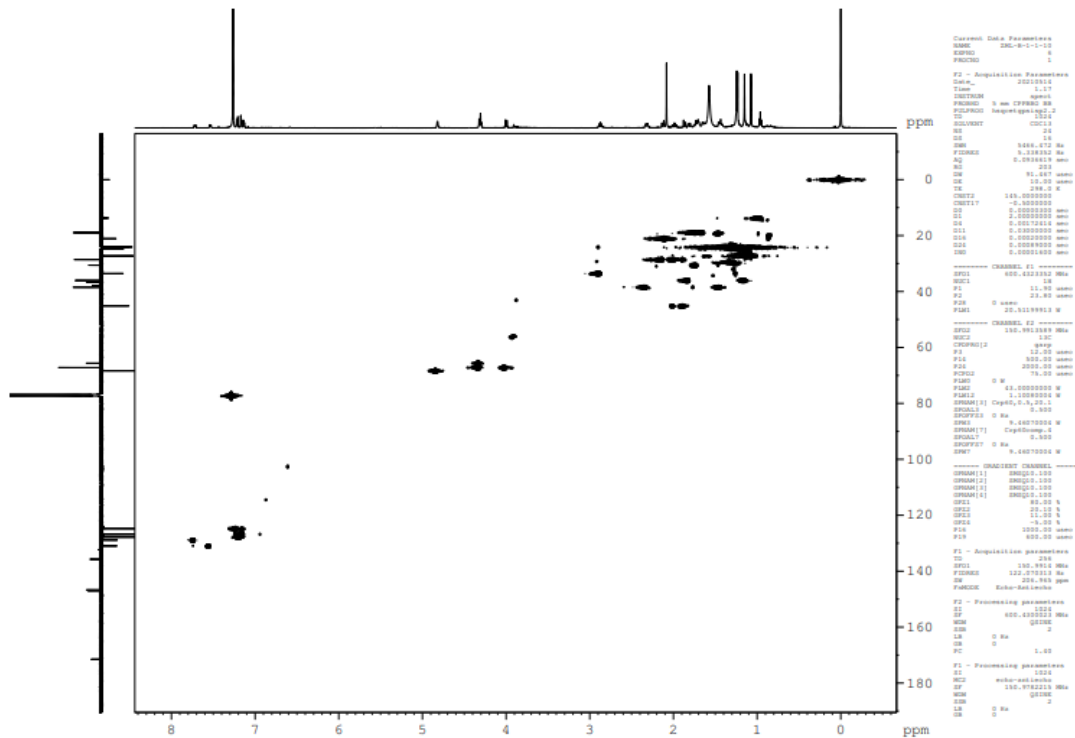

Figure S4 HSQC ( $\text{CDCl}_3$ ) spectrum of **1**

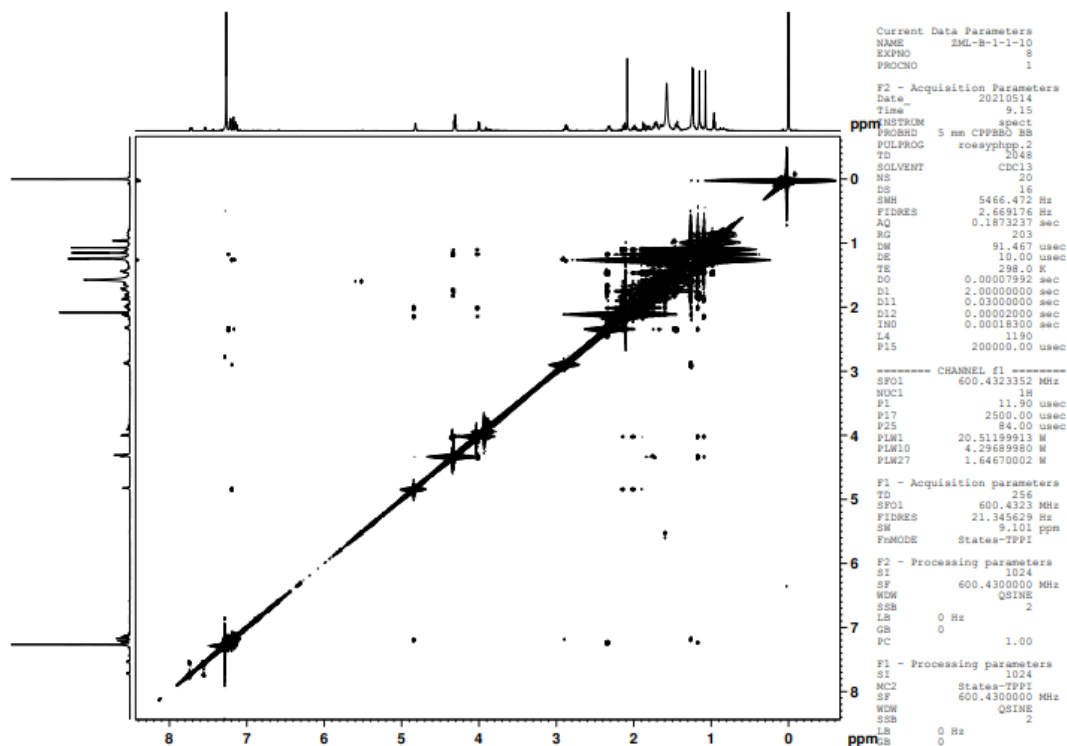

Figure S5 NOESY (CDCl<sub>3</sub>) spectrum of **1**

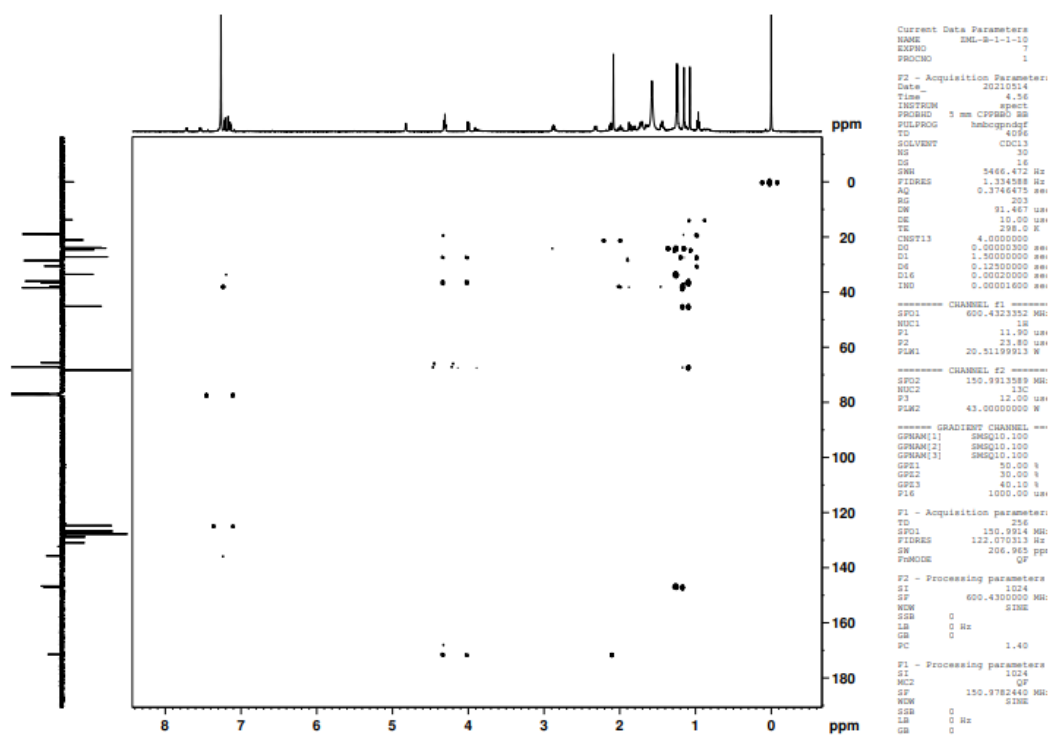

Figure S6 HMBC (CDCl<sub>3</sub>) spectrum of **1**

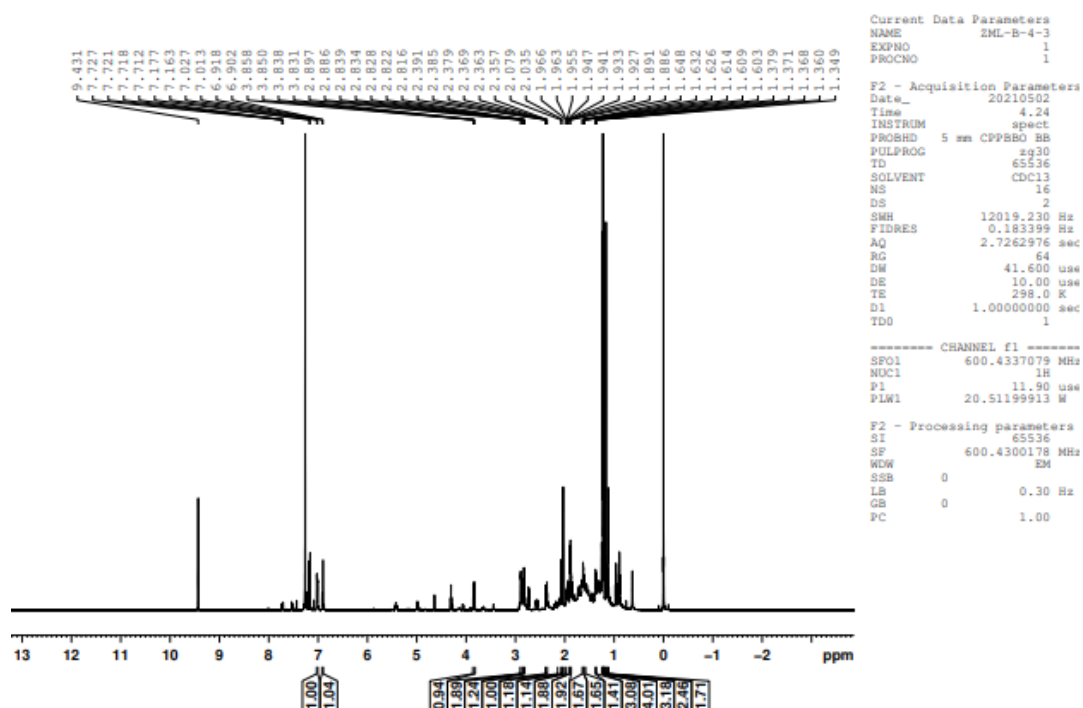

Figure S7  $^1\text{H}$ -NMR (600 MHz,  $\text{CDCl}_3$ ) spectrum of **2**

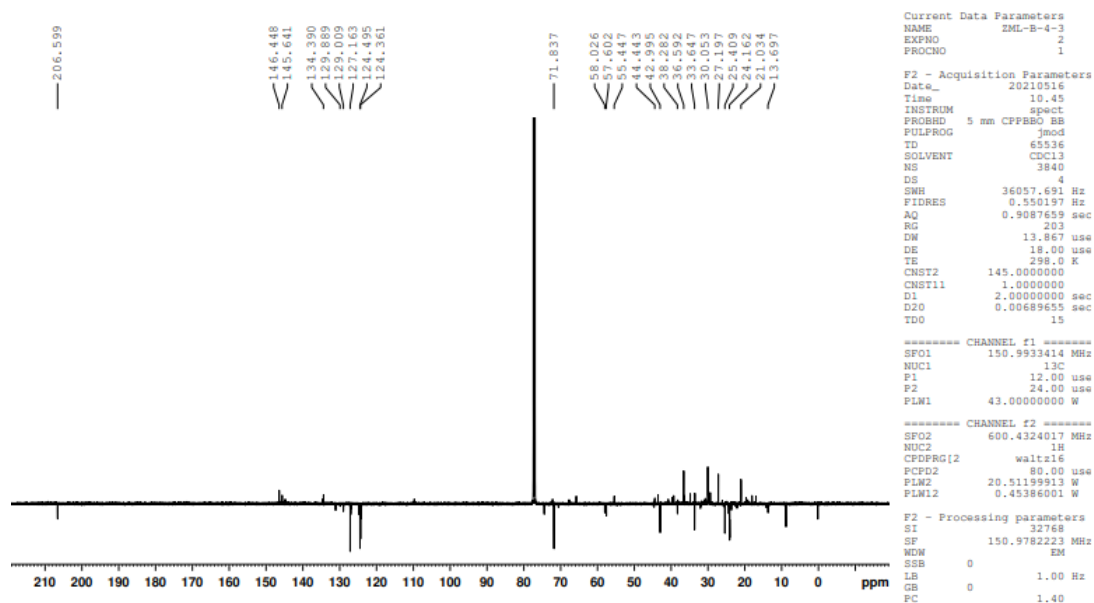

Figure S8  $^{13}\text{C}$ -APT (150 MHz,  $\text{CDCl}_3$ ) spectrum of **2**

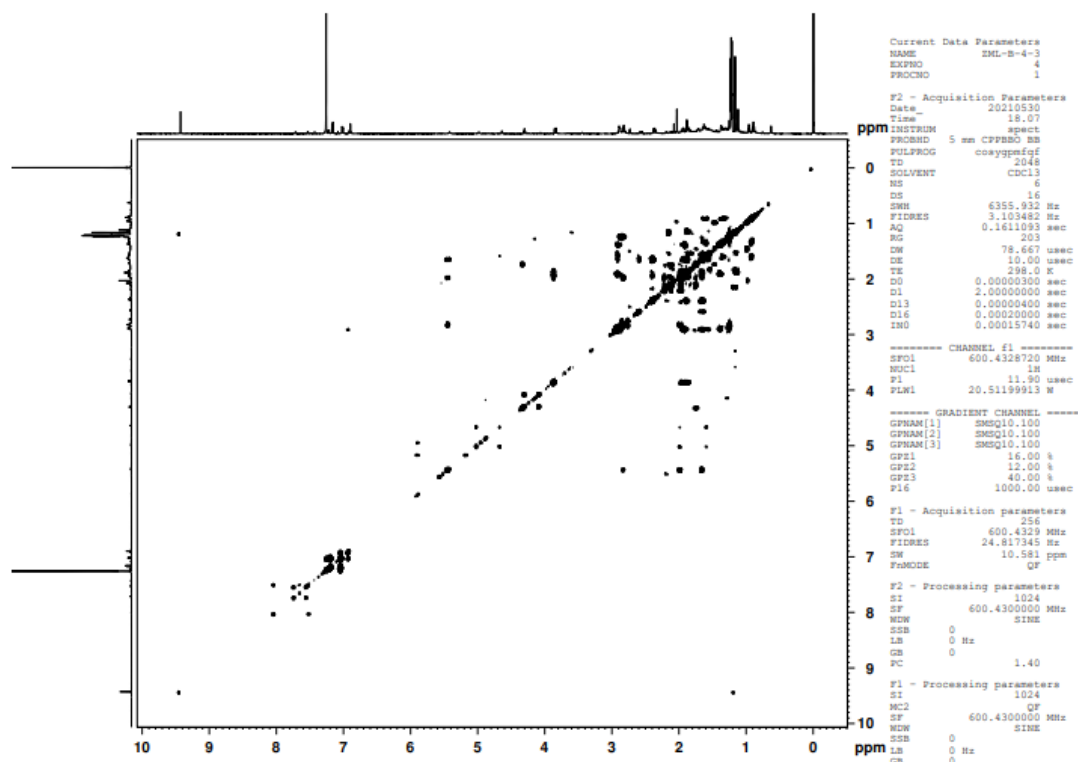

Figure S9  $^1\text{H}$ - $^1\text{H}$  COSY ( $\text{CDCl}_3$ ) spectrum of 2

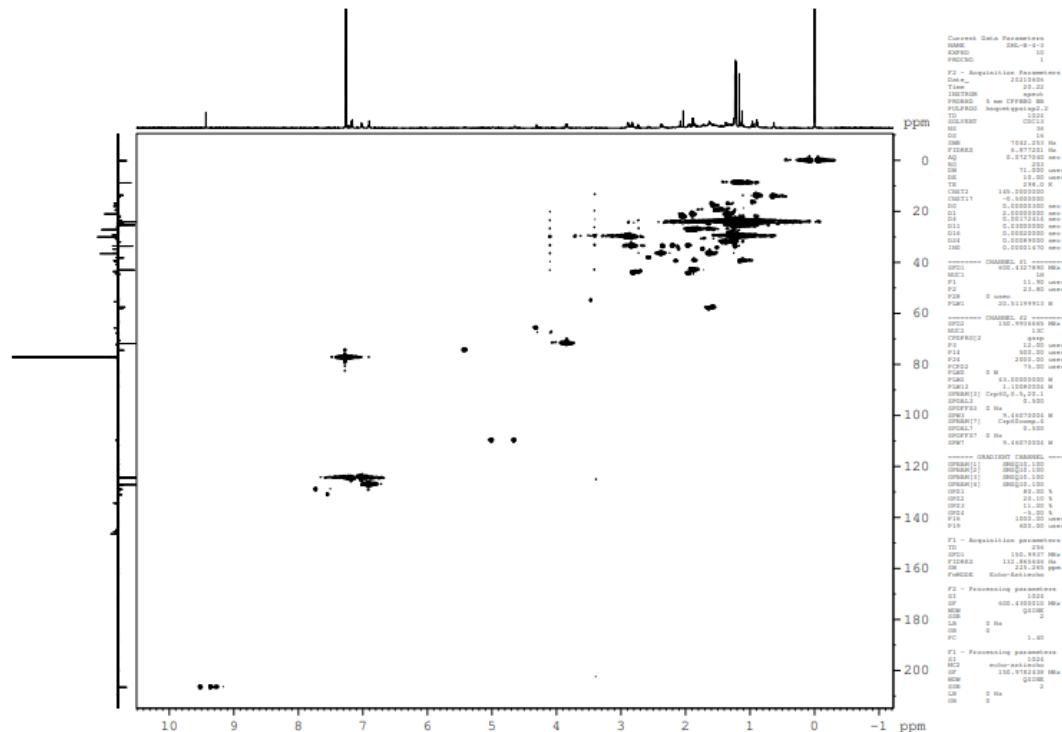

Figure S10 HSQC ( $\text{CDCl}_3$ ) spectrum of 2

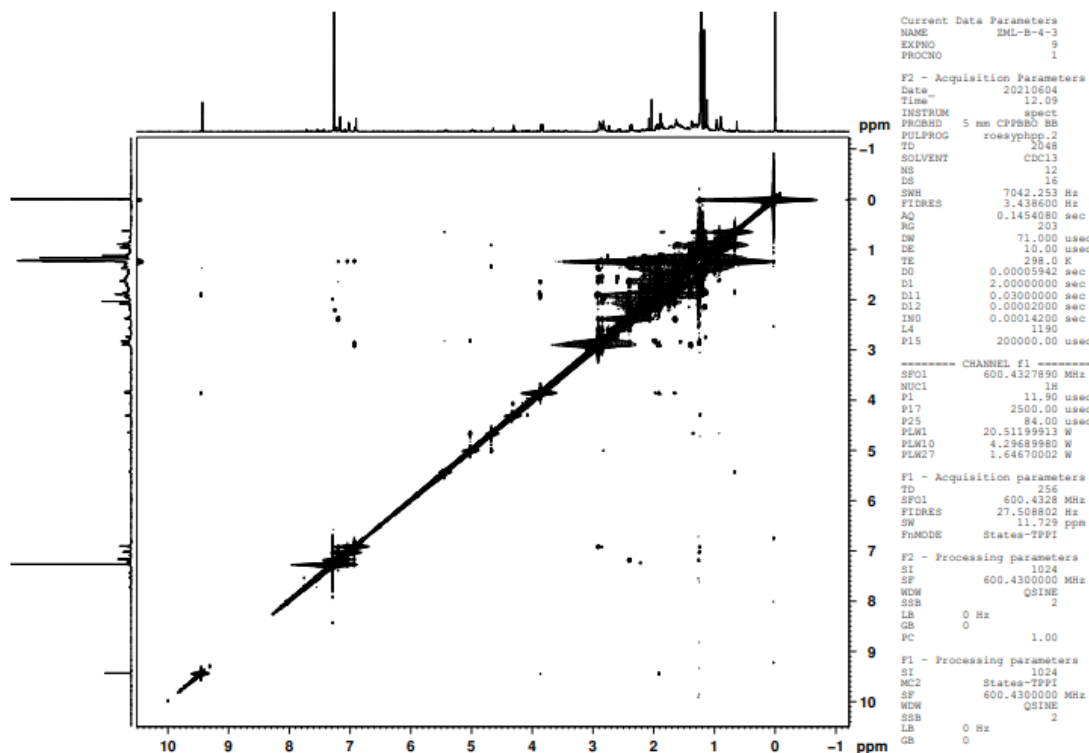

Figure S11 NOESY (CDCl<sub>3</sub>) spectrum of **2**

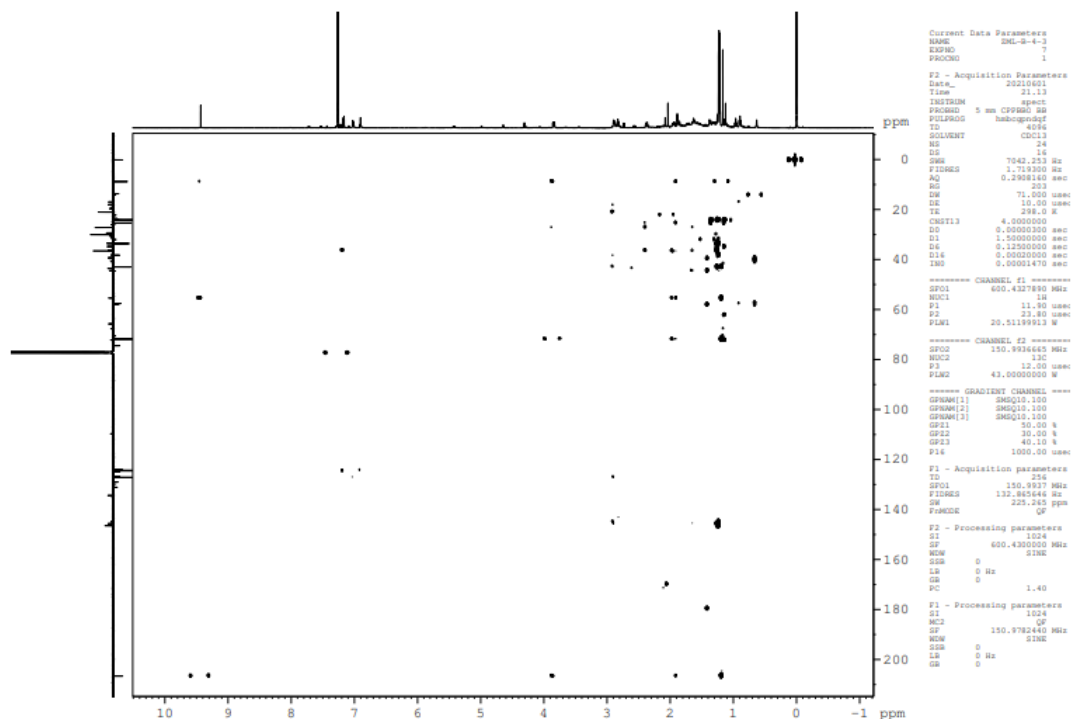

Figure S12 HMBC (CDCl<sub>3</sub>) spectrum of **2**

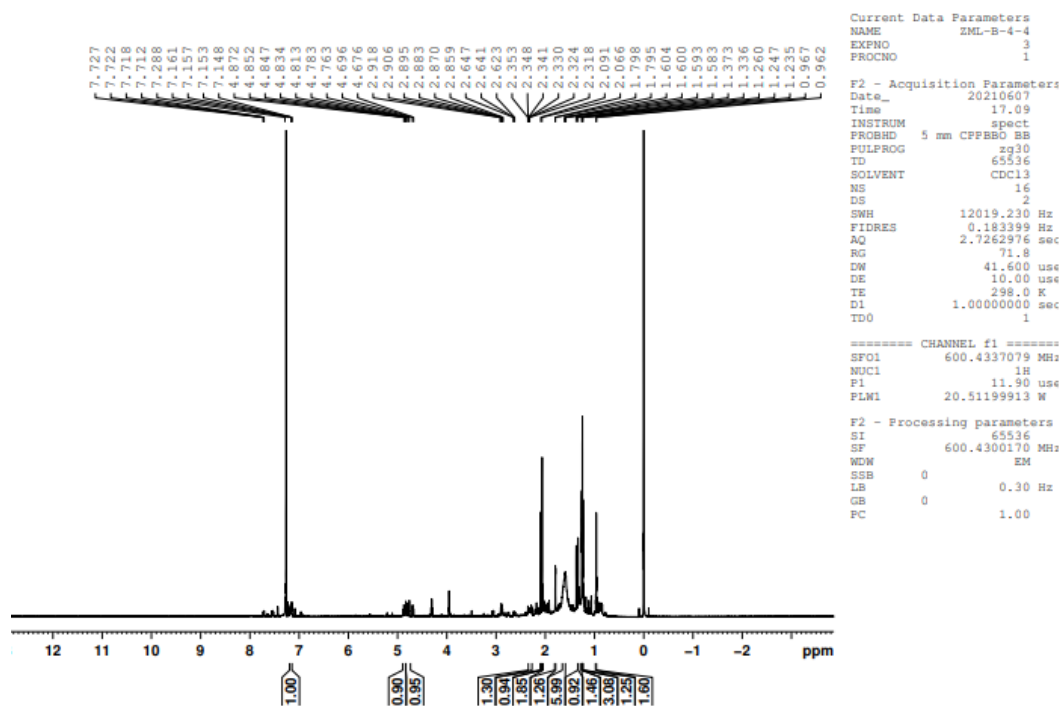

Figure S13  $^1\text{H}$ -NMR (600 MHz,  $\text{CDCl}_3$ ) spectrum of **3**

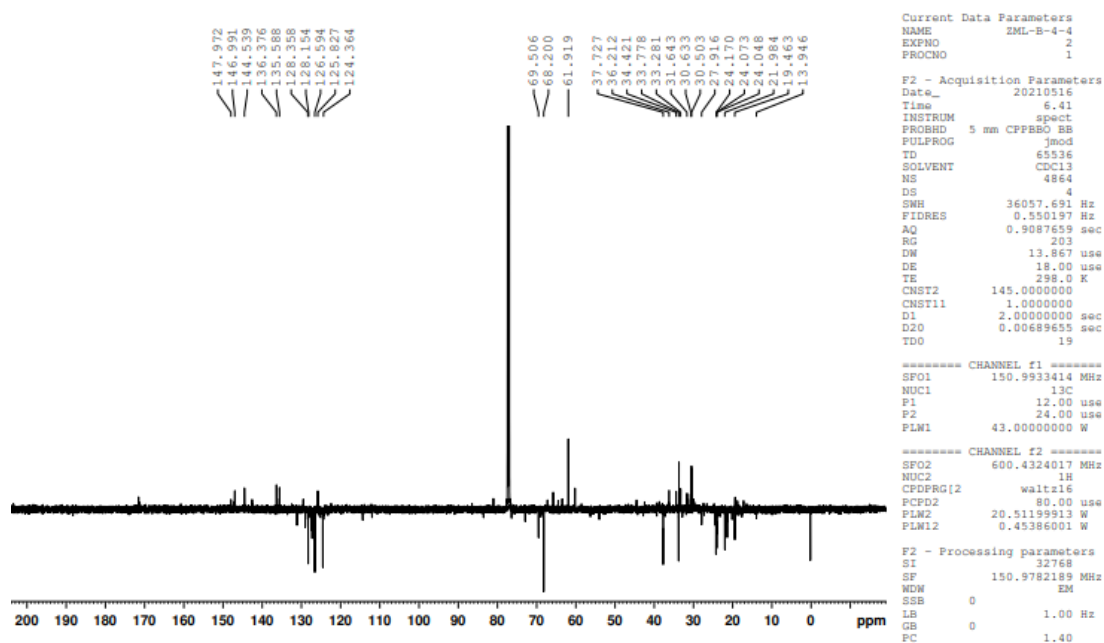

Figure S14  $^{13}\text{C}$ -APT (150 MHz,  $\text{CDCl}_3$ ) spectrum of **3**





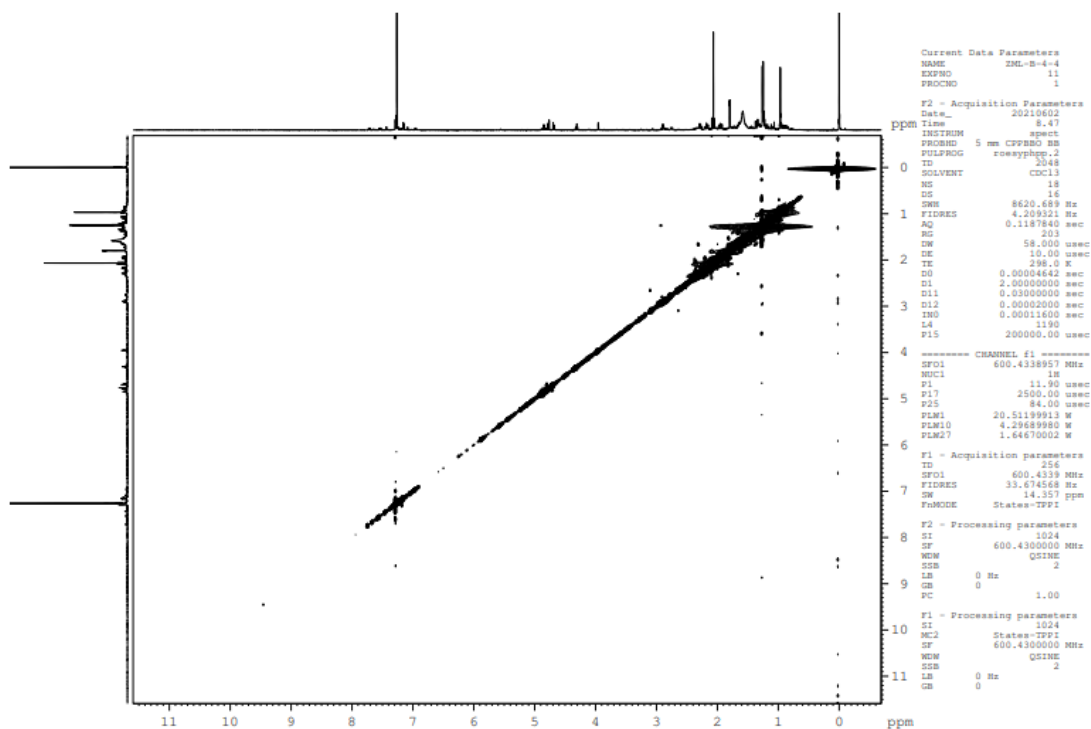

Figure S17 NOESY (CDCL<sub>3</sub>) spectrum of **3**

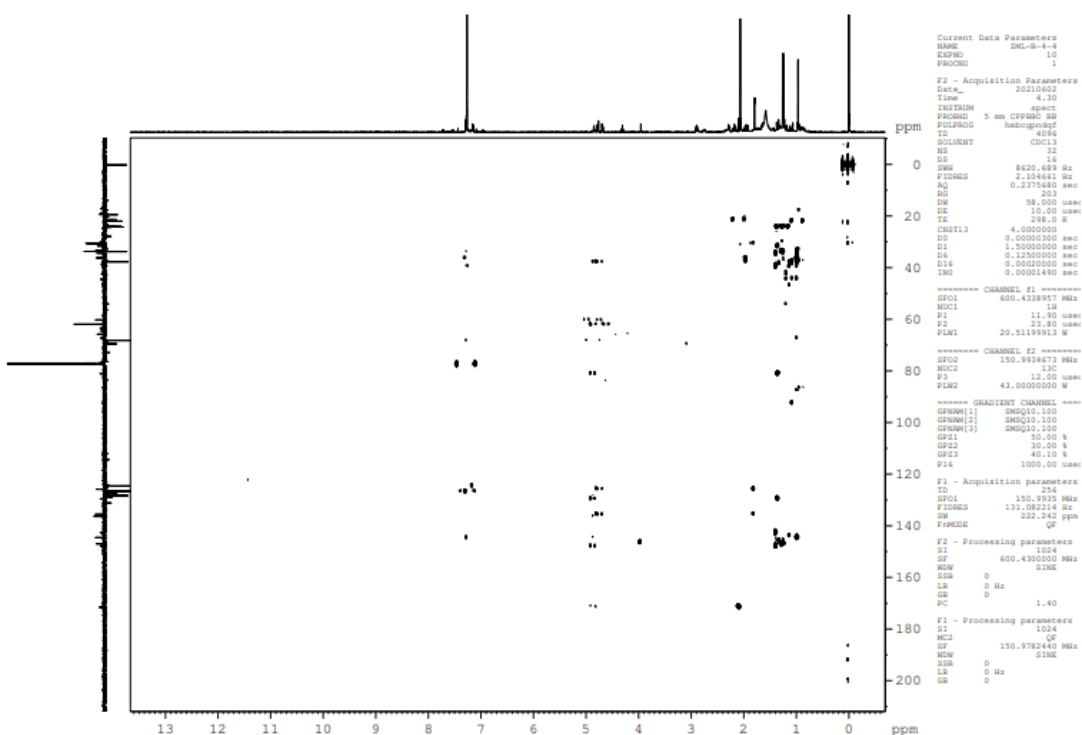

Figure S18 HMBC (CDCL<sub>3</sub>) spectrum of **3**

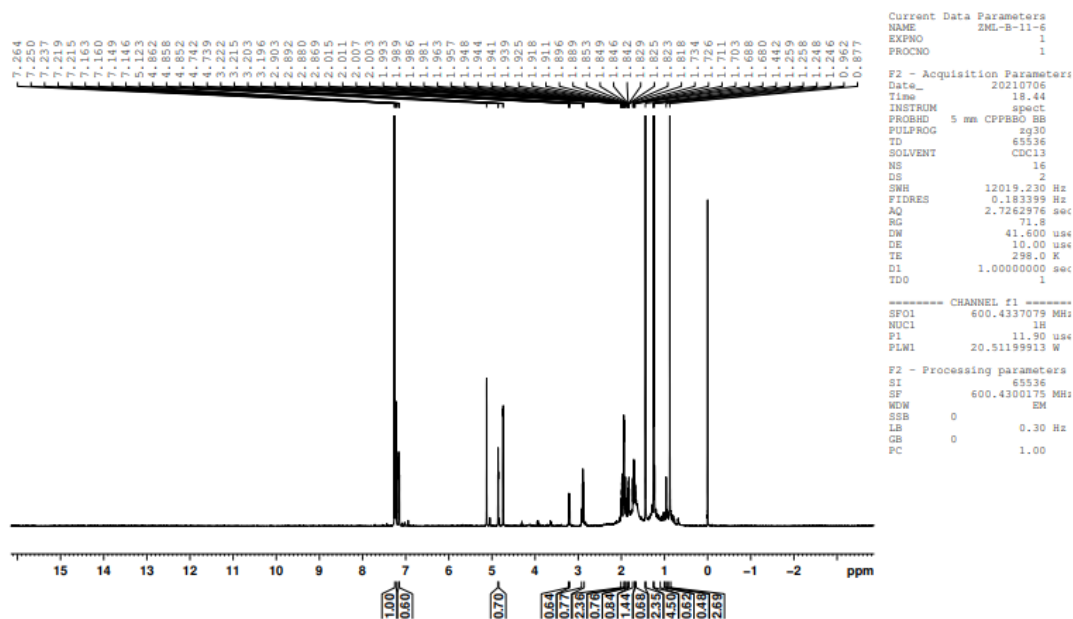

Figure S19  $^1\text{H}$ -NMR (600 MHz,  $\text{CDCl}_3$ ) spectrum of **4**

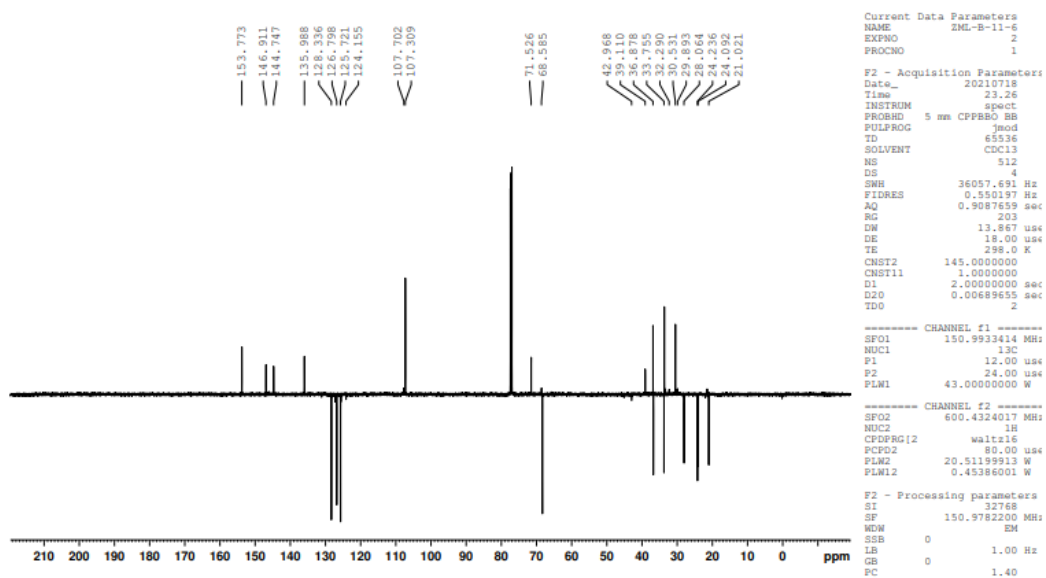

Figure S20  $^{13}\text{C}$ -APT (150 MHz,  $\text{CDCl}_3$ ) spectrum of **4**

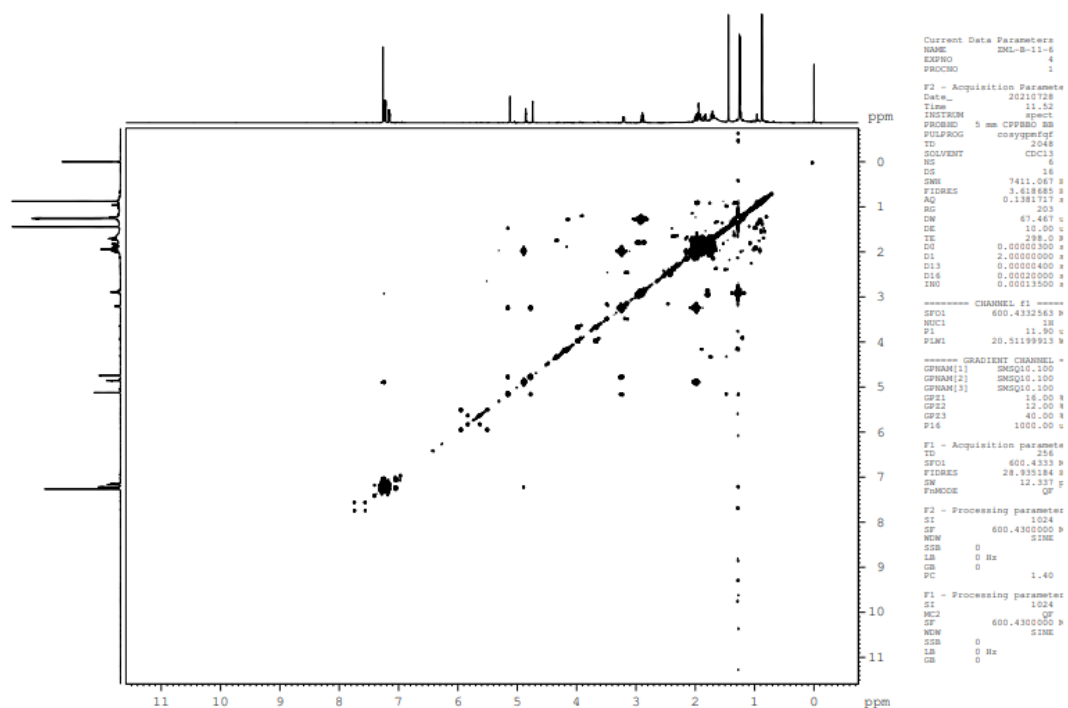

Figure S21  $^1\text{H}$ - $^1\text{H}$  COSY ( $\text{CDCl}_3$ ) spectrum of **4**

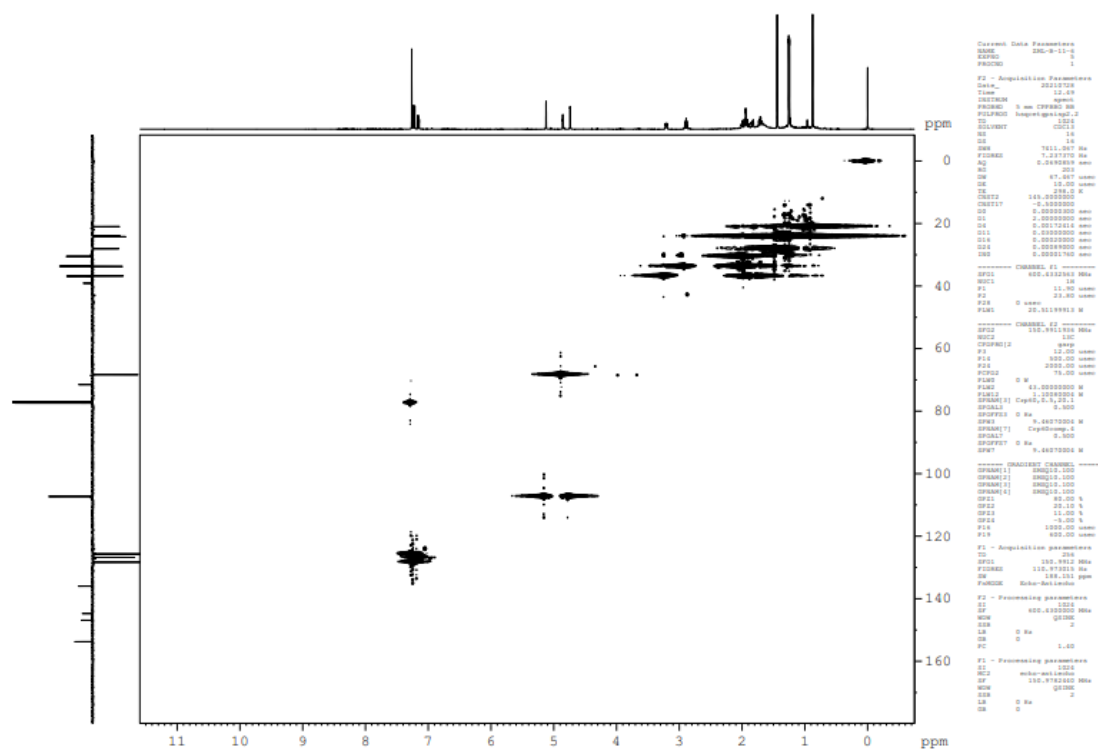

Figure S22 HSQC ( $\text{CDCl}_3$ ) spectrum of **4**

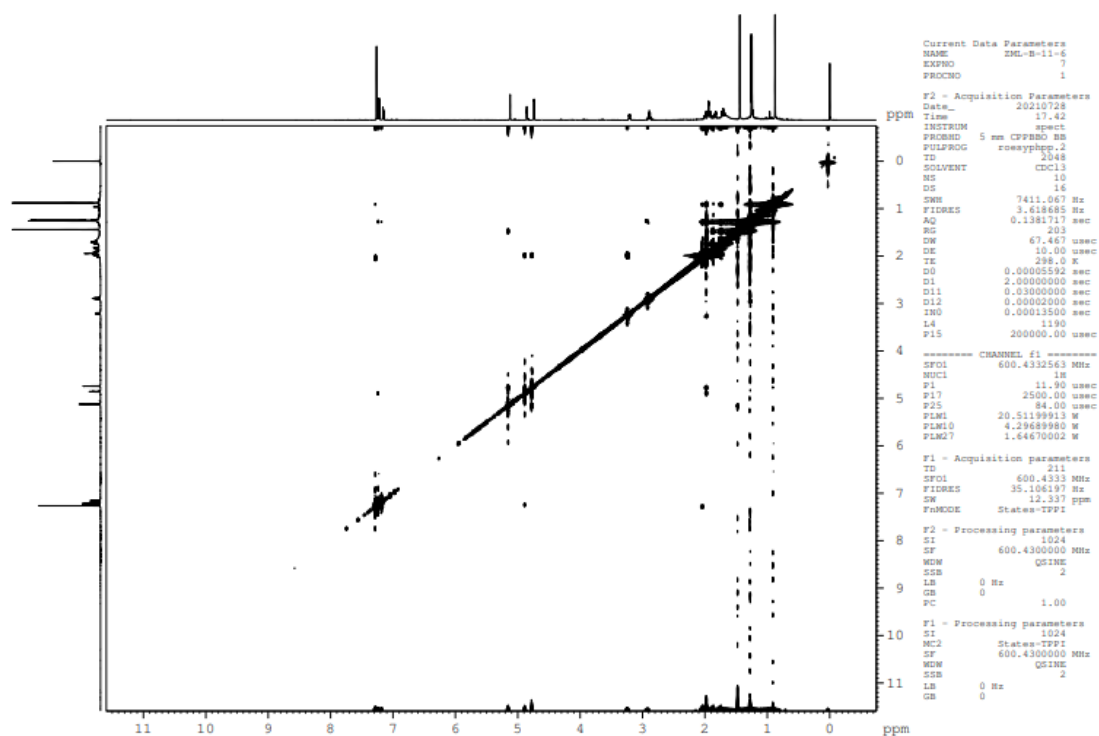

Figure S23 NOESY (CDCl<sub>3</sub>) spectrum of 4

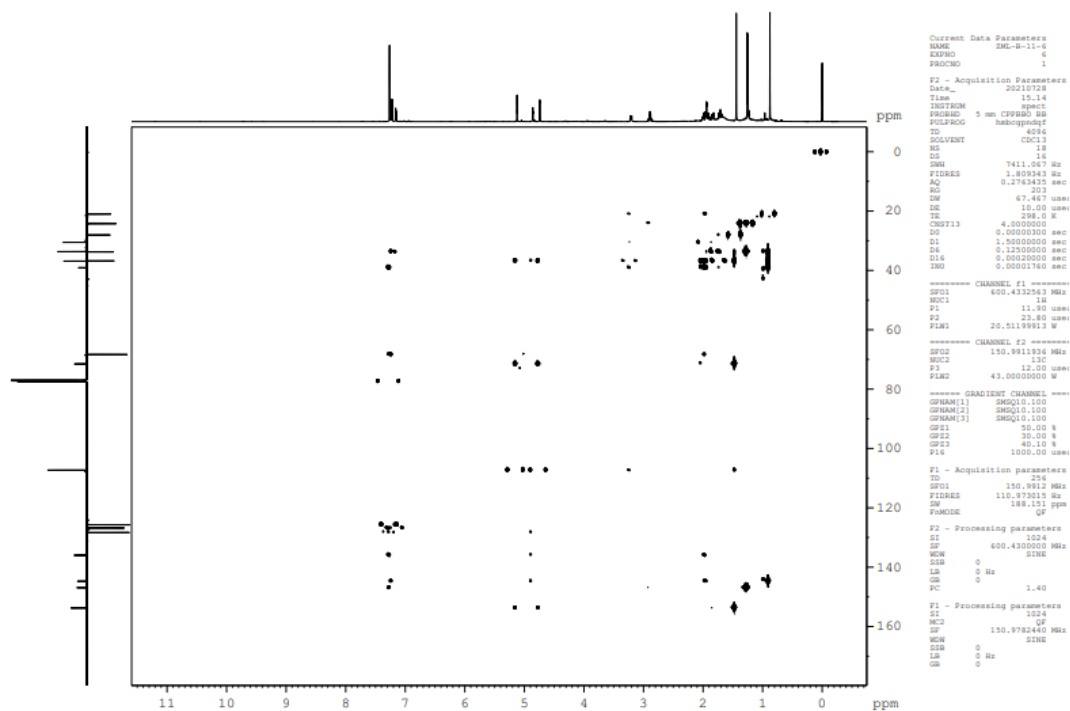

Figure S24 HMBC (CDCl<sub>3</sub>) spectrum of 4

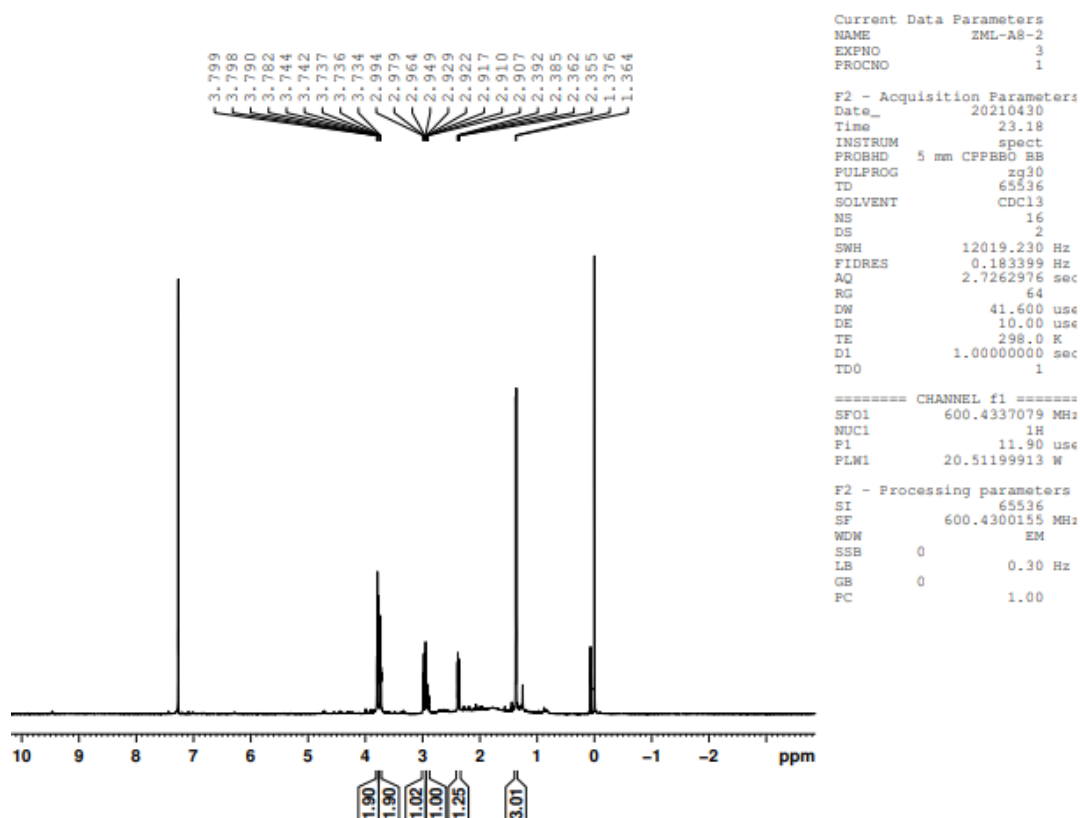

Figure S25  $^1\text{H}$ -NMR (600 MHz,  $\text{CDCl}_3$ ) spectrum of **5**

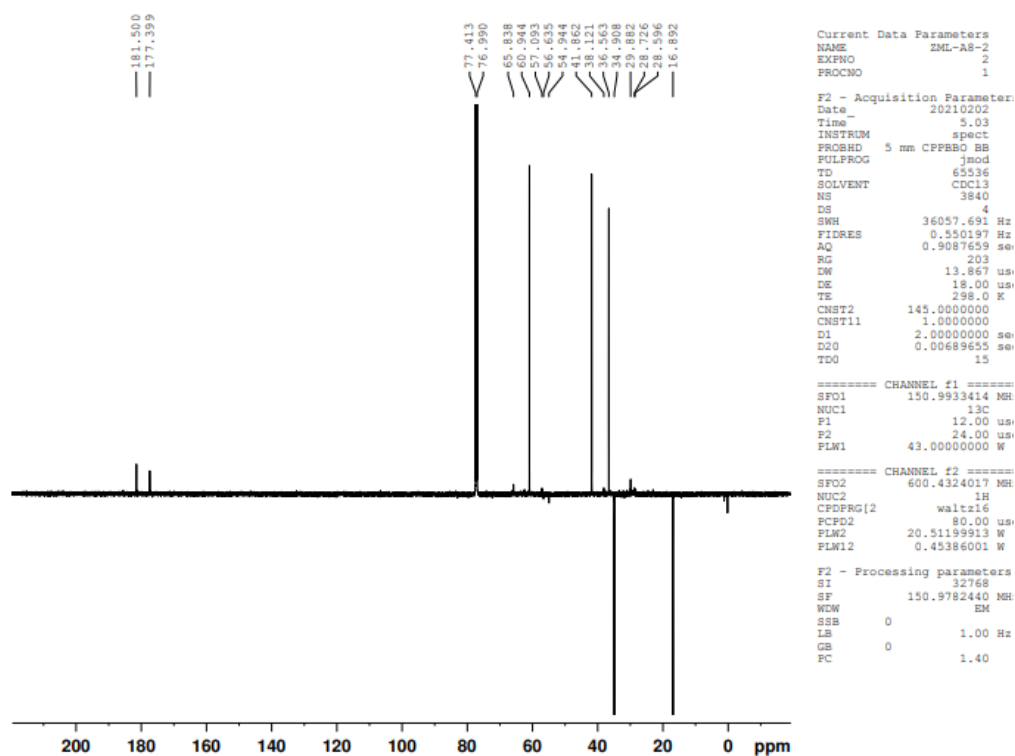

Figure S26  $^{13}\text{C}$ -APT (150 MHz,  $\text{CDCl}_3$ ) spectrum of **5**

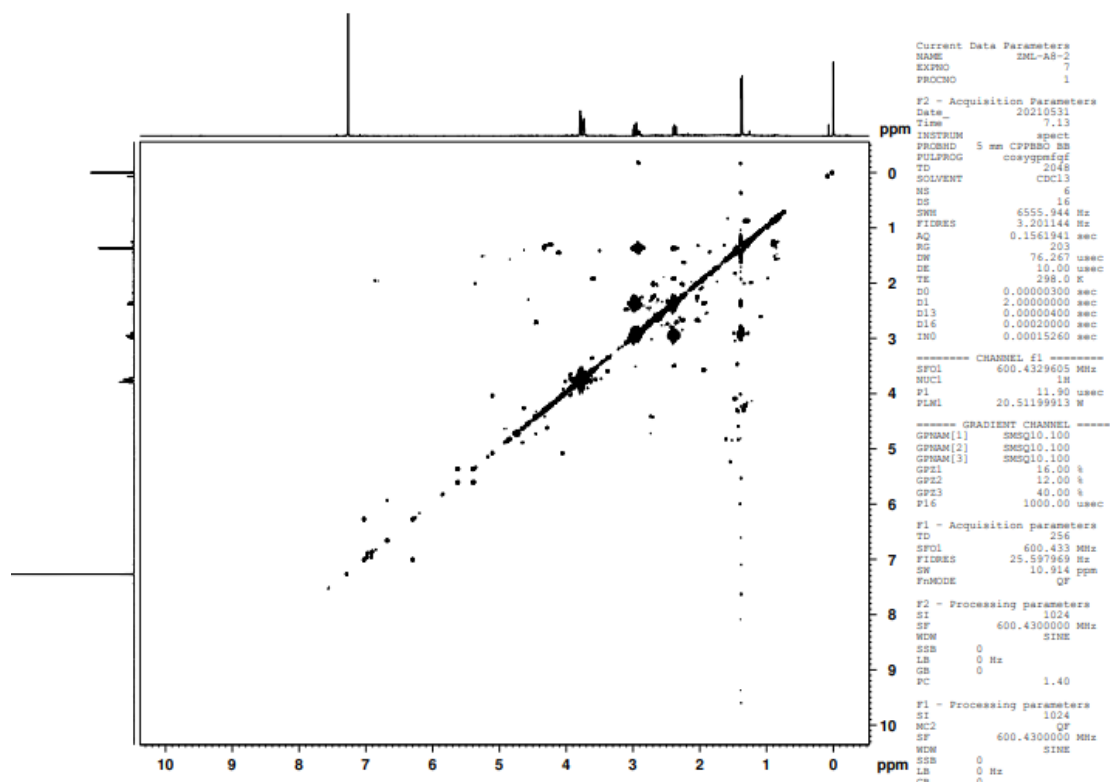

Figure S27  $^1\text{H}$ - $^1\text{H}$  COSY ( $\text{CDCl}_3$ ) spectrum of **5**

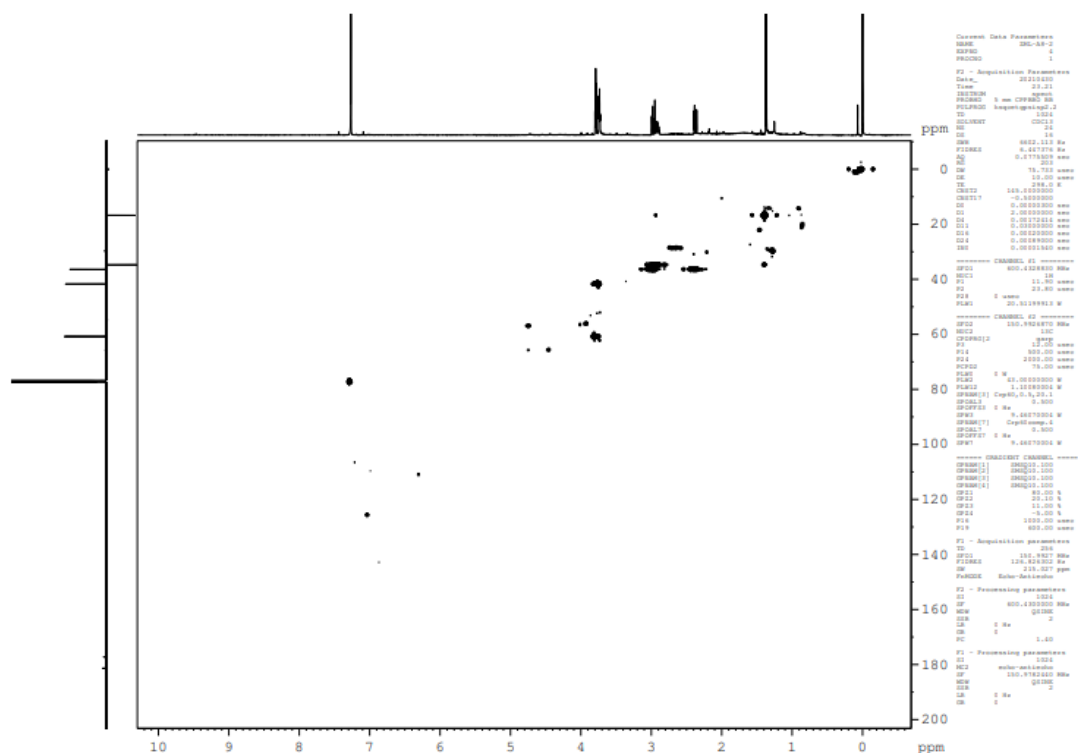

Figure S28 HSQC ( $\text{CDCl}_3$ ) spectrum of **5**

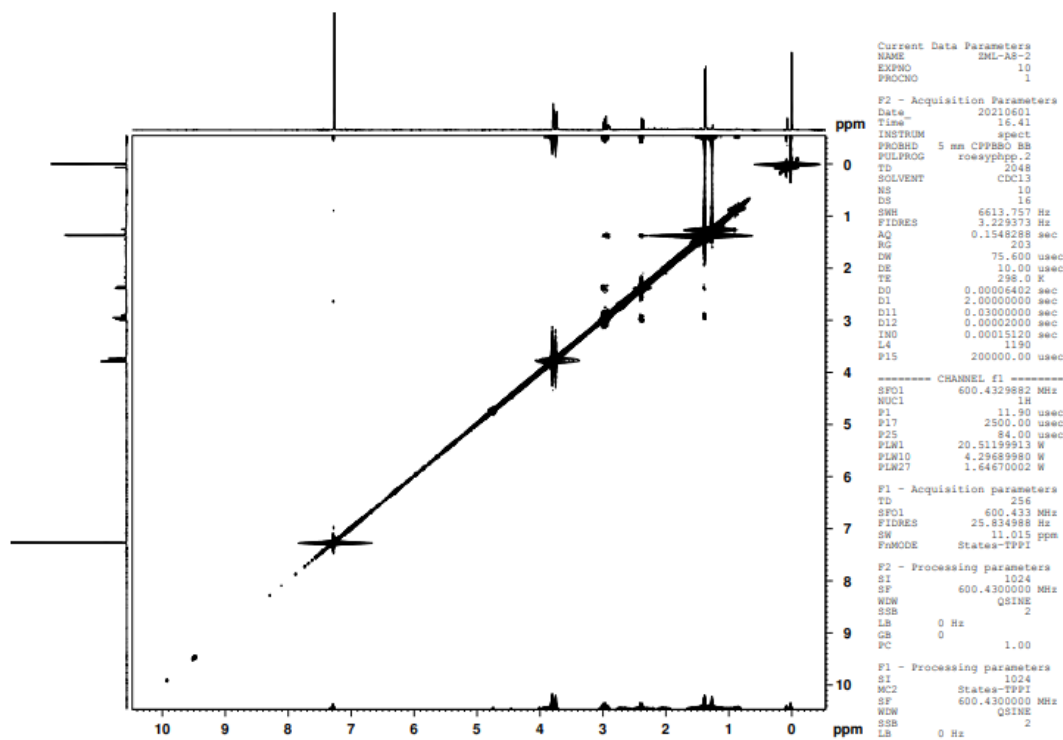

Figure S29 NOESY (CDCl<sub>3</sub>) spectrum of **5**

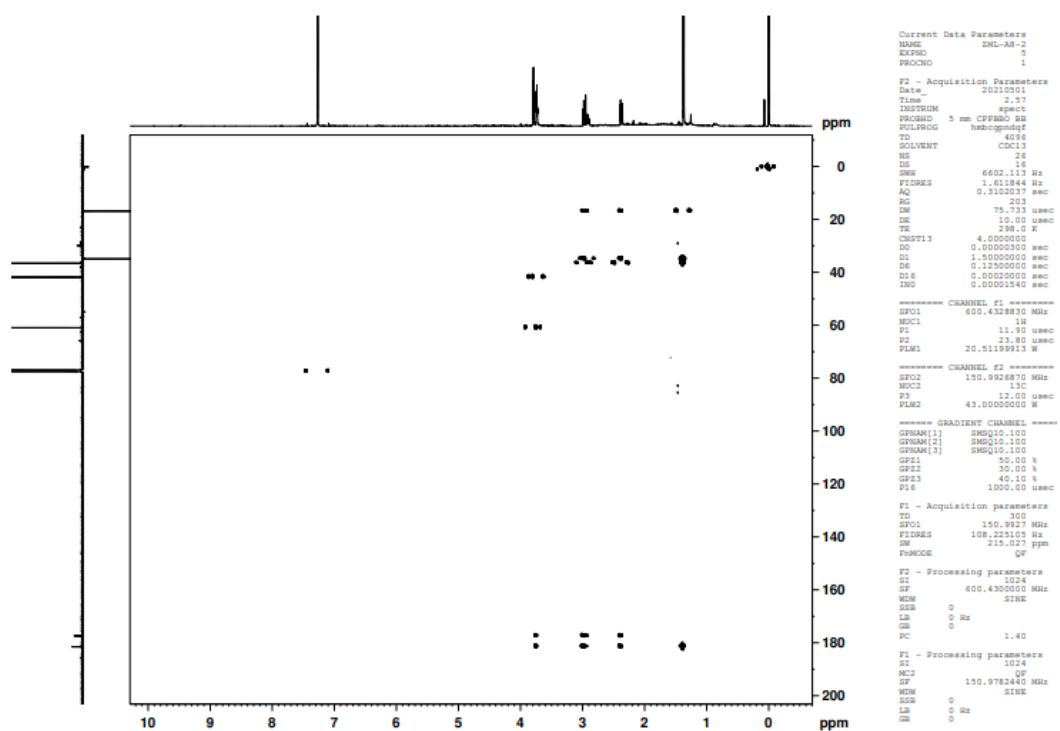

Figure S30 HMBC (CDCl<sub>3</sub>) spectrum of **5**



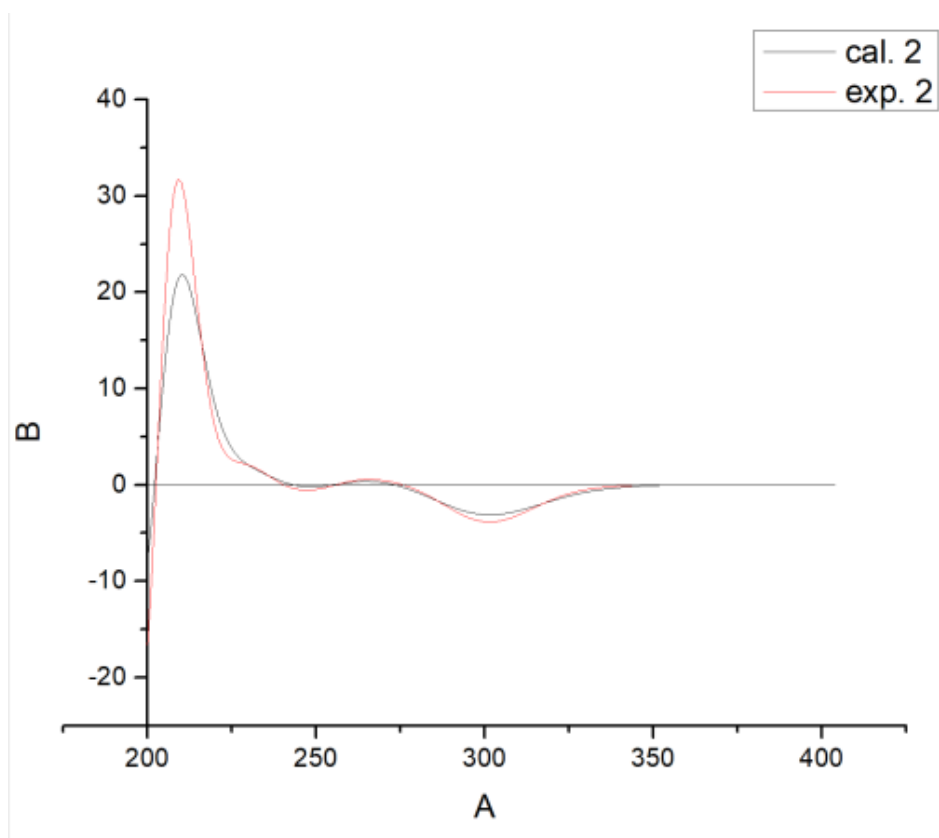

**Figure S31** Experimental and calculated ECD spectra of **2**

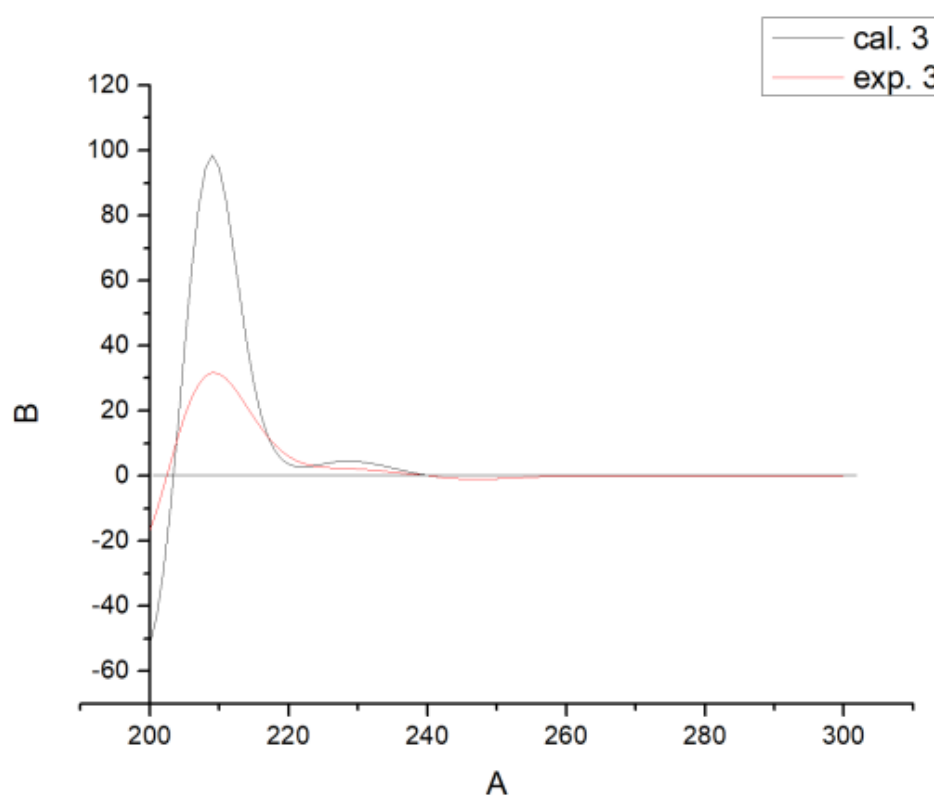

**Figure S32** Experimental and calculated ECD spectra of **3**

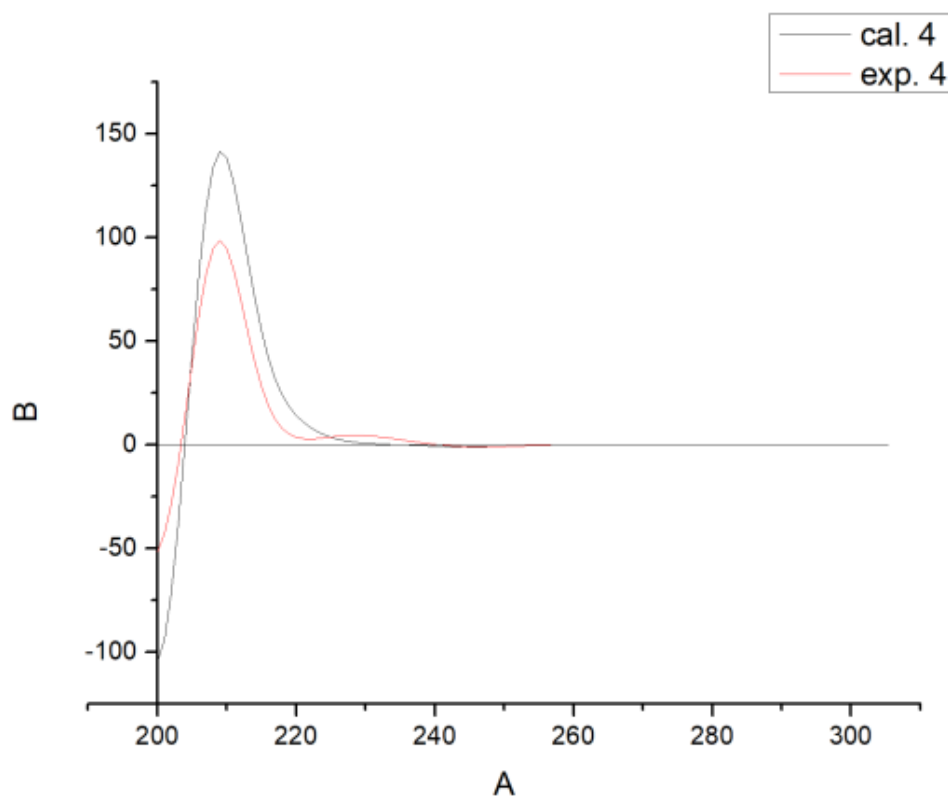

**Figure S33** Experimental and calculated ECD spectra of **4**

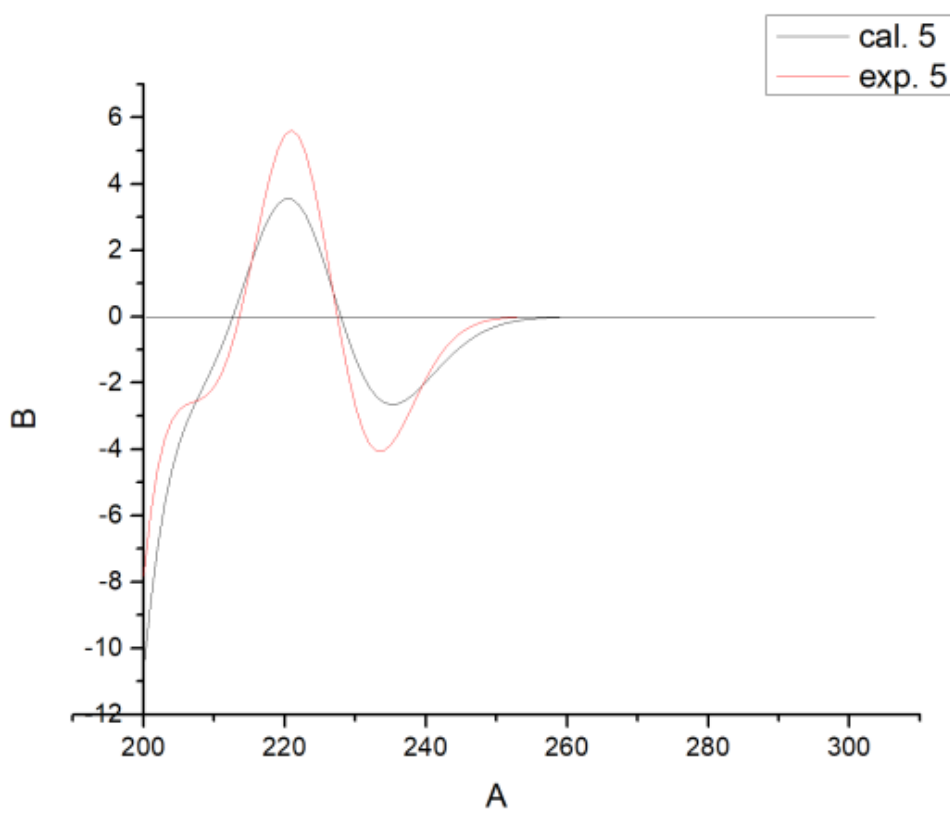

**Figure S34** Experimental and calculated ECD spectra of **5**
